# Supplementary material for: Clinical Impact of the Use of Warfarin in Patients with Atrial Fibrillation Undergoing Maintenance Hemodialysis
Source: MDPI journal article supplement (doi:10.3390/jcm13082404), 2024-04-20
Supplement: s1 [file s1]

## **Supplementary materials**

**Table S1.** Medication types and Health Insurance Review and Assessment Service codes

**Table S2.** Codes associated with cardiac and cerebrovascular outcomes

**Table S3.** Other factors associated with all-cause mortality or hemorrhagic stroke

**Table S4.** Baseline characteristics after propensity score matching

**Table S5.** Cox regression analyses using cohort after propensity score matching

**Figure S1.** Study flowchart

**Figure S2.** Distribution of propensity score before and after matching

**Table S1.** Medication types and Health Insurance Review and Assessment Service codes

| <b>Medications</b>                      | <b>Codes</b>                                                                                                                                                        |
|-----------------------------------------|---------------------------------------------------------------------------------------------------------------------------------------------------------------------|
| Atorvastatin                            | 111502ATB, 502202ATB, 633900ATB, 472400ATB, 518900ATB, 524100ATB, 527000ATB, 672000ATR, 672100ATR, 111503ATB, 502203ATB, 634800ATB, 472500ATB, 111504ATB, 502204ATB |
| Fluvastatin                             | 162401ACH, 162402ACH, 162403ATR                                                                                                                                     |
| Lovastatin                              | 185801ATB                                                                                                                                                           |
| Pitavastatin                            | 470901ATB, 470902ATB, 470903ATB                                                                                                                                     |
| Pravastatin                             | 216601ATB, 216602ATB, 216603ATB, 216604ATB                                                                                                                          |
| Rosuvastatin                            | 454001ATB, 454002ATD, 454002ATB, 454003ATB, 454003ATD, 454005ATB                                                                                                    |
| Simvastatin                             | 227801ATB, 227802ATB, 227803ATB, 227805ATB, 227806ATB                                                                                                               |
| Valsartan + Pitavastatin                | 634900ATB, 635000ATB, 635100ATB, 635200ATB                                                                                                                          |
| Valsartan + Rosuvastatin                | 629700ATB, 629800ATB, 525000ATB, 525100ATB, 525200ATB, 525300ATB,                                                                                                   |
| Olmesartan + Rosuvastatin               | 653200ATB, 644100ATB, 644200ATB, 526300ATB, 526400ATB, 526500ATB, 526900ATB                                                                                         |
| Telmisartan + Rosuvastatin              | 629900ATB, 630000ATB, 630100ATB, 630200ATB, 631600ATB, 631700ATB                                                                                                    |
| Telmisartan + Rosuvastatin + Amlodipine | 671700ATB, 671600ATB, 671500ATB, 671400ATB, 671300ATB, 671200ATB,                                                                                                   |
| Losartan + Rosuvastatin + Amlodipine    | 663900ATB, 664000ATB, 664100ATB, 664200ATB, 664300ATB, 664400ATB,                                                                                                   |
| Fimasartan + Rosuvastatin               | 654600ATB, 654700ATB, 654800ATB, 654900ATB, 655000ATB                                                                                                               |
| Candesartan + Rosuvastatin              | 673700ATB, 661800ATB, 661900ATB, 662000ATB, 662100ATB                                                                                                               |
| Irbesartan + Atorvastatin               | 527000ATB, 527100ATB, 524000ATB, 524100ATB                                                                                                                          |
| Atorvastatin + Ezetimibe                | 633800ATB, 633900ATB, 634800ATB                                                                                                                                     |
| Pitavastatin + Fenofibrate              | 679300ACH                                                                                                                                                           |
| Rosuvastatin + Ezetimibe                | 640700ATB, 640800ATB, 640900ATB                                                                                                                                     |
| Amosulalol                              | 107901ATB, 107902ATB                                                                                                                                                |
| Arotinolol                              | 110202ATB, 110201ATB                                                                                                                                                |
| Atenolol                                | 483102ATB, 111402ATB, 483101ATB, 111403ATB, 111401ATB                                                                                                               |
| Atenolol + Chlorthalidone               | 262100ATB, 460200ATB                                                                                                                                                |
| Betaxolol                               | 116801ATB, 116803ATB                                                                                                                                                |
| Bevantolol                              | 117002ATB, 117001ATB                                                                                                                                                |
| Bisoprolol                              | 117904ATB, 117903ATB, 117902ATB, 117901ATB                                                                                                                          |
| Bisoprolol + Hydrochlorothiazide        | 469800ATB, 470000ATB, 469900ATB                                                                                                                                     |
| Carteolol                               | 124801ATB                                                                                                                                                           |
| Carvedilol                              | 125005ATB, 125003ATB, 662201ATB, 125008ACR,                                                                                                                         |

|                                  |                                                                                                              |
|----------------------------------|--------------------------------------------------------------------------------------------------------------|
|                                  | 125001ATB, 662202ATB, 125007ACR, 125002ATB, 125006ACR, 125004ACR                                             |
| Celiprolol                       | 129101ATB                                                                                                    |
| Metoprolol                       | 194003ATR, 193802ATB, 262400ATR                                                                              |
| Metoprolol + Hydrochlorothiazide | 262600ATB                                                                                                    |
| Metoprolol + Felodipine          | 262400ATR                                                                                                    |
| Nadolol                          | 198301ATB                                                                                                    |
| Nebivolol                        | 489501ATB, 489502ATB, 489503ATB                                                                              |
| Propranolol                      | 219901ATB, 219904ATB, 219906ACR, 219905ACR                                                                   |
| Aspirin                          | 110701ATB, 110702ATB, 110801ATB, 110802ATB, 111001ACE, 111001ATB, 111001ATE, 111002ATE, 111003ACE, 111003ATE |
| Clopidogrel                      | 133201ACR, 133201ATB, 133201ATR, 133202ATB, 133203ATR, 506100ATB                                             |
| Aspirin + Bethocarbamol          | 256800ATB                                                                                                    |
| Aspirin + Clopidogrel            | 517900ACH, 517900ACE, 517900ATE, 667500ACE                                                                   |
| Aspirin + Dipyridamole           | 489700ACR                                                                                                    |
| Warfarin                         | 249103ATB, 249105ATB                                                                                         |
| Dabigatran                       | 613701ACH, 613702ACH                                                                                         |
| Rivaroxaban                      | 511401ATB, 511402ATB, 511403ATB, 511404ATB                                                                   |
| Apixaban                         | 617001ATB, 617002ATB                                                                                         |
| Edoxaban                         | 643601ATB, 643602ATB, 643603ATB                                                                              |

**Table S2. Codes associated with cardiovascular events.**

|                                     |                                                       |         |
|-------------------------------------|-------------------------------------------------------|---------|
| <b>ICD-10 codes</b>                 |                                                       |         |
| Myocardial infarction               |                                                       | I21–I23 |
| Stroke                              |                                                       | I60–I63 |
| <b>Procedure or operation codes</b> |                                                       |         |
| Percutaneous coronary intervention  | M6551, M6552, M6561–M6564, M6571, M6572, M6601, M6602 |         |
| Coronary artery bypass grafting     | O1641, O1642, O1647, OA641, OA642, OA647              |         |
| <b>Medical treatment codes</b>      |                                                       |         |
| Protein C                           | 635801BIJ                                             |         |
| Tissue-type plasminogen activator   | 223501BIJ, 223502BIJ                                  |         |
| Tenecteplase                        | 450302BIJ, 450301BIJ                                  |         |
| Tirofiban                           | 240201BIJ, 240230BIJ                                  |         |
| Urokinase                           | 246401BIJ, 246405BIJ, 246407BIJ, 246404BIJ, 246406BIJ |         |

**Table S3. Other factors associated with all-cause mortality or hemorrhagic stroke**

|                                                          | All-cause mortality |          |                  |          | Hemorrhagic stroke |                 |                  |                 |
|----------------------------------------------------------|---------------------|----------|------------------|----------|--------------------|-----------------|------------------|-----------------|
|                                                          | Univariate          |          | Multivariable    |          | Univariate         |                 | Multivariable    |                 |
|                                                          | HR (95% CI)         | <i>P</i> | HR (95% CI)      | <i>P</i> | HR (95% CI)        | <i>P</i> -value | HR (95% CI)      | <i>P</i> -value |
| Age (increase in 1 year)                                 | 1.06 (1.05–1.06)    | <0.001   | 1.05 (1.05–1.06) | <0.001   | 1.01 (0.99–1.02)   | 0.387           | 1.00 (0.99–1.01) | 0.934           |
| Sex (ref: male)                                          | 0.97 (0.90–1.05)    | 0.438    | 0.85 (0.78–0.93) | <0.001   | 1.11 (0.87–1.43)   | 0.397           | 0.97 (0.72–1.31) | 0.845           |
| BMI (increase in 1 kg/m <sup>2</sup> )                   | 0.97 (0.96–0.98)    | <0.001   | 0.96 (0.95–0.97) | <0.001   | 0.94 (0.90–0.97)   | <0.001          | 0.93 (0.89–0.97) | <0.001          |
| Vascular access type (ref: AVF)                          | 1.27 (1.15–1.39)    | <0.001   | 1.05 (0.96–1.16) | 0.276    | 1.20 (0.88–1.62)   | 0.247           | 1.12 (0.82–1.52) | 0.489           |
| Diabetes                                                 | 1.38 (1.28–1.49)    | <0.001   | 1.35 (1.24–1.46) | <0.001   | 1.38 (1.08–1.77)   | 0.010           | 1.51 (1.14–1.99) | 0.004           |
| HD vintage (increase in 1 M)                             | 0.99 (0.99–1.00)    | 0.810    | 1.01 (1.00–1.01) | <0.001   | 1.00 (0.99–1.00)   | 0.747           | 1.00 (0.99–1.00) | 0.816           |
| CCI score (increase in 1 unit)                           | 1.08 (1.07–1.10)    | <0.001   | 1.03 (1.02–1.05) | <0.001   | 1.05 (1.01–1.09)   | 0.042           | 1.02 (0.98–1.07) | 0.342           |
| UFV (increase in 1 kg/session)                           | 0.90 (0.87–0.94)    | <0.001   | 1.08 (1.03–1.13) | 0.002    | 0.93 (0.81–1.06)   | 0.273           | 0.95 (0.82–1.11) | 0.518           |
| Kt/V <sub>urea</sub> (increase in in 1 unit)             | 0.92 (0.79–1.08)    | 0.336    | 0.69 (0.57–0.84) | <0.001   | 1.41 (0.87–2.27)   | 0.165           | 1.15 (0.63–2.08) | 0.651           |
| Hb (increase in 1 g/dL)                                  | 0.90 (0.86–0.94)    | <0.001   | 0.93 (0.89–0.97) | 0.002    | 0.85 (0.74–0.99)   | 0.033           | 0.86 (0.74–1.00) | 0.054           |
| Albumin (increase in 1 g/dL)                             | 0.44 (0.39–0.50)    | <0.001   | 0.64 (0.56–0.73) | <0.001   | 0.84 (0.58–1.22)   | 0.354           | 0.86 (0.58–1.29) | 0.472           |
| Cr (increase in 1 mg/dL)                                 | 0.89 (0.88–0.90)    | <0.001   | 0.95 (0.94–0.97) | <0.001   | 0.96 (0.92–1.01)   | 0.080           | 0.98 (0.92–1.05) | 0.585           |
| Phos (increase in 1 mg/dL)                               | 0.90 (0.87–0.92)    | <0.001   | 1.07 (1.04–1.11) | <0.001   | 1.01 (0.92–1.10)   | 0.882           | 1.08 (0.98–1.20) | 0.134           |
| Calcium (increase in 1 mg/dL)                            | 0.97 (0.92–1.02)    | 0.202    | 1.08 (1.03–1.14) | 0.003    | 1.17 (1.00–1.36)   | 0.047           | 1.20 (1.02–1.41) | 0.024           |
| Clopidogrel (ref: non-user)                              | 1.36 (1.25–1.47)    | <0.001   | 1.19 (1.09–1.29) | <0.001   | 1.13 (0.87–1.48)   | 0.359           | 1.14 (0.86–1.52) | 0.349           |
| Aspirin (ref: non-user)                                  | 1.12 (1.04–1.21)    | 0.004    | 1.03 (0.95–1.12) | 0.440    | 1.05 (0.82–1.34)   | 0.728           | 1.08 (0.83–1.40) | 0.558           |
| Satins (ref: non-user)                                   | 1.08 (0.99–1.16)    | 0.061    | 0.95 (0.87–1.03) | 0.250    | 1.06 (0.83–1.36)   | 0.635           | 1.04 (0.79–1.36) | 0.781           |
| β-blockers (ref: non-user)                               | 0.98 (0.91–1.06)    | 0.686    | 1.01 (0.94–1.09) | 0.761    | 1.15 (0.90–1.46)   | 0.281           | 1.08 (0.84–1.38) | 0.571           |
| CHA <sub>2</sub> DS <sub>2</sub> -VAS <sub>C</sub> score | 1.10 (1.08–1.13)    | <0.001   | –                | –        | 1.12 (1.04–1.21)   | 0.004           | –                | –               |

|                |                  |        |   |   |                  |       |   |   |
|----------------|------------------|--------|---|---|------------------|-------|---|---|
| HAS-BLED score | 1.35 (1.30–1.40) | <0.001 | – | – | 1.16 (1.04–1.31) | 0.010 | – | – |
|----------------|------------------|--------|---|---|------------------|-------|---|---|

---

Multivariate analysis was adjusted for the use of warfarin; age; sex; BMI; vascular access type; HD vintage; diabetes; CCI score; UFV; Kt/V<sub>urea</sub>; Hb, serum albumin, serum Cr, Phos, and serum calcium levels; and the use of statins, clopidogrel, aspirin, or  $\beta$ -blockers and was performed using enter mode.

**Abbreviations:** AV, arteriovenous fistula; BMI, body mass index; CCI, Charlson Comorbidity Index; CI, confidence interval; Cr, creatinine; Hb, hemoglobin; HD, hemodialysis; HR, hazard ratio; Phos, phosphorus; UFV, ultrafiltration volume

**Table S4. Baseline characteristics after propensity score matching**

|                                      | <b>No group<br/>(n = 4,009)</b> | <b>Warfarin group<br/>(n = 820)</b> | <b><i>P</i>-value</b> |
|--------------------------------------|---------------------------------|-------------------------------------|-----------------------|
| Age (years)                          | 67.0 ± 11.4                     | 66.9 ± 10.9                         | 0.888                 |
| Sex (male, %)                        | 1015 (62.6%)                    | 527 (64.3%)                         | 0.450                 |
| Hemodialysis vintage (days)          | 52 ± 58                         | 53 ± 59                             | 0.812                 |
| Body mass index (kg/m <sup>2</sup> ) | 22.4 ± 3.6                      | 22.4 ± 3.4                          | 0.934                 |
| Underlying cause of ESKD (diabetes)  | 919 (56.7%)                     | 363 (44.3%)                         | 0.682                 |
| CCI score                            | 8.8 ± 2.9                       | 8.8 ± 2.7                           | 0.942                 |
| Kt/V <sub>urea</sub>                 | 1.52 ± 0.24                     | 1.51 ± 0.25                         | 0.732                 |
| UFV (L/session)                      | 2.3 ± 0.9                       | 2.3 ± 0.8                           | 0.890                 |
| Hemoglobin (g/dL)                    | 10.7 ± 0.9                      | 10.7 ± 0.9                          | 0.536                 |
| Serum albumin (g/dL)                 | 3.92 ± 0.35                     | 3.91 ± 0.33                         | 0.504                 |
| Serum phosphorus (mg/dL)             | 4.7 ± 1.3                       | 4.7 ± 1.3                           | 0.946                 |
| Serum calcium (mg/dL)                | 8.9 ± 0.8                       | 8.9 ± 0.8                           | 0.400                 |
| Serum creatinine (mg/dL)             | 8.6 ± 2.5                       | 8.7 ± 2.5                           | 0.887                 |
| Use of aspirin                       | 627 (38.7%)                     | 319 (38.9%)                         | 0.950                 |
| Use of clopidogrel                   | 298 (18.4%)                     | 138 (16.8%)                         | 0.373                 |
| Use of statins                       | 602 (37.1%)                     | 396 (48.3%)                         | <0.001                |
| Use of β-blockers                    | 858 (52.9%)                     | 450 (54.9%)                         | 0.385                 |

Data are expressed as mean ± standard deviation for continuous variables and as numbers (percentages) for categorical variables. *P*-values are determined using a t-test, and Pearson's  $\chi^2$  test was performed for categorical variables. Abbreviations: CCI, Charlson Comorbidity index; ESKD, end-stage kidney disease; UFV, ultrafiltration volume

**Table S5. Cox regression analyses using cohort after propensity score matching**

|                       | Univariate       |          | Multivariable    |          |
|-----------------------|------------------|----------|------------------|----------|
|                       | HR (95% CI)      | <i>P</i> | HR (95% CI)      | <i>P</i> |
| All-cause mortality   | 1.15 (1.03–1.29) | 0.016    | 1.14 (1.02–1.28) | 0.025    |
| Ischemic stroke       | 0.96 (0.74–1.25) | 0.777    | 0.96 (0.74–1.24) | 0.749    |
| Hemorrhagic stroke    | 1.74 (1.23–2.47) | 0.002    | 1.76 (1.24–2.50) | 0.001    |
| Cardiovascular events | 0.94 (0.73–1.22) | 0.643    | 0.95 (0.73–1.23) | 0.678    |

Adjustments in multivariable analysis included body mass index, vascular access type, age, sex, diabetes, Charlson Comorbidity Index score, hemodialysis vintage, ultrafiltration volume, Kt/V<sub>urea</sub>, serum albumin, hemoglobin, serum calcium, serum creatinine, serum phosphorus, systolic blood pressure, diastolic blood pressure, and use of anti-hypertensive drug, aspirin, and statins. The analysis was conducted using the enter mode. Abbreviations: CI, confidence interval; HR, hazard ratio.



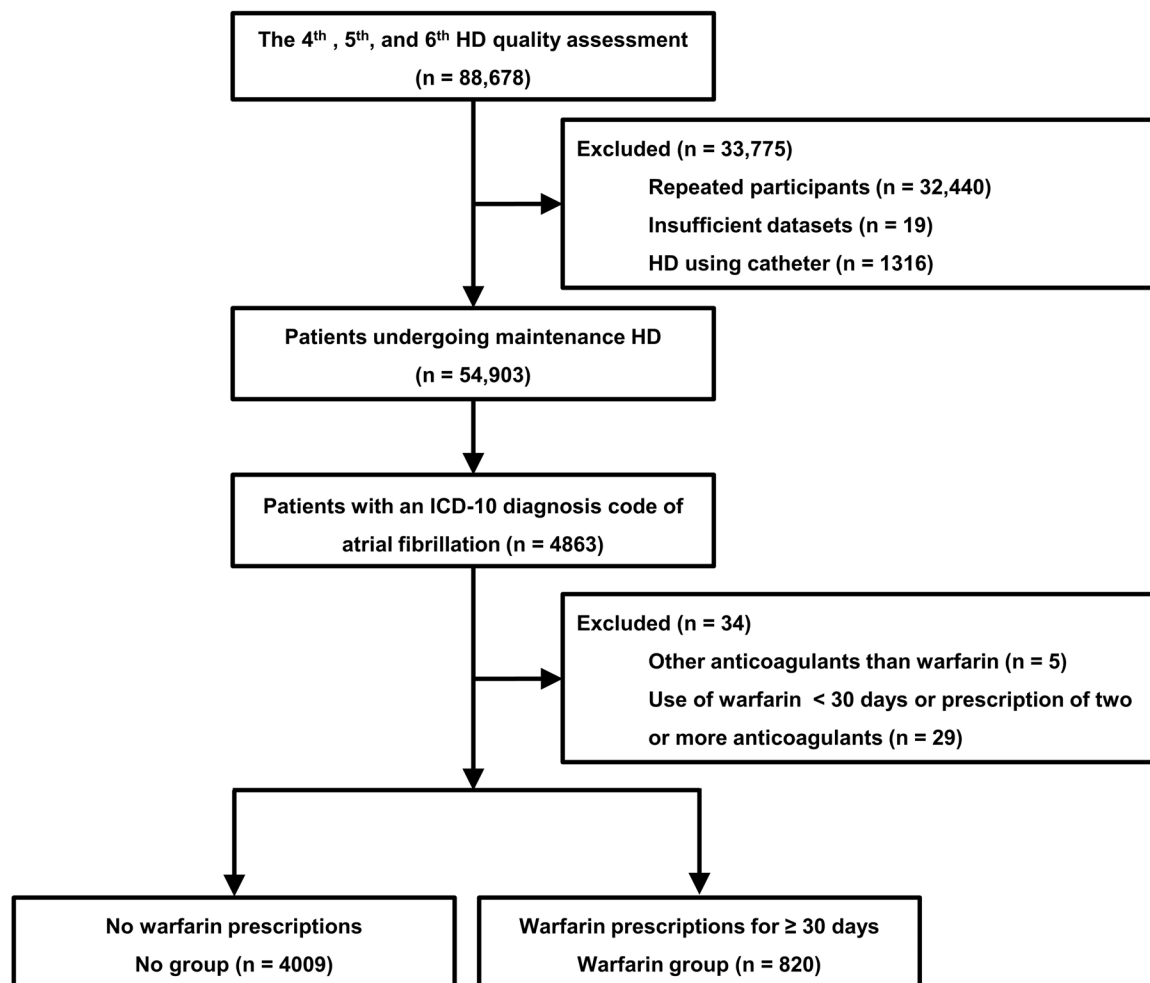

**Figure S1.** Study flow chart.

**Abbreviations:** HD, hemodialysis; ICD-10, International Classification of Disease-10<sup>th</sup> version.

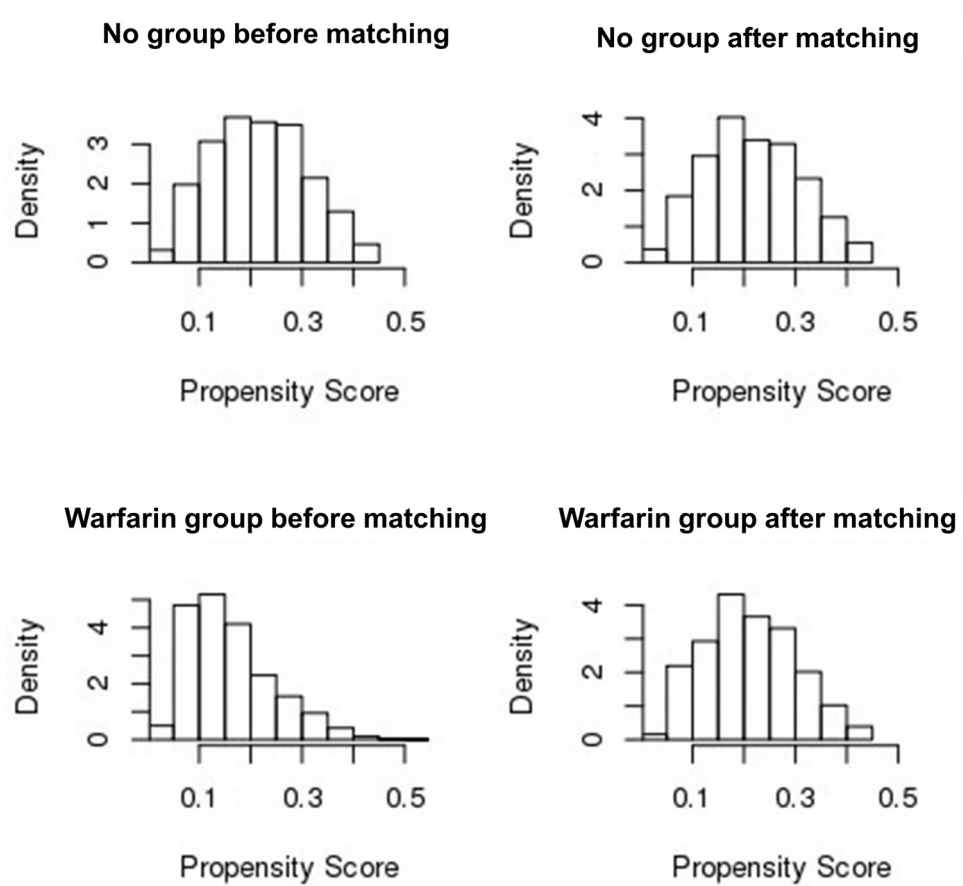

**Figure S2.** Distribution of propensity score before and after matching.
